# Supplementary material for: Pocket MUSE: an affordable, versatile and high-performance fluorescence microscope using a smartphone
Source: Springer Nature journal article supplement (doi:10.1038/s42003-021-01860-5), 2021-03-12
Supplement: 42003_2021_1860_MOESM3_ESM.pdf [file 42003_2021_1860_MOESM3_ESM.pdf]

## **Description of Additional Supplementary Files**

**File Name:** Supplementary Video 1

**Description:** An example procedure for cheek cell cytology imaging using Pocket MUSE.

**File Name:** Supplementary Video 2

**Description:** An example video showing suspended bacteria stained with acridine orange under Pocket MUSE preview.

**File Name:** Supplementary Video 3

**Description:** A live roundworm moving around a piece of grimmia moss imaged with 3 different modalities using Pocket MUSE.
